# Supplementary material for: Whole-genome DNA methylation characteristics in pediatric precursor B cell acute lymphoblastic leukemia (BCP ALL)
Source: PLoS One. 2017 Nov 10;12(11):e0187422. doi: 10.1371/journal.pone.0187422 (PMC5695275; doi:10.1371/journal.pone.0187422)
Supplement: S2 Appendix — (XLSX) [file pone.0187422.s002.xlsx]

## Sheet: Arkusz1
Probe	AveExpr	t	P.Value	adj.P.Val	B	ALL_B_AVG	CTR_AVG	deltaBeta	CHR	MAPINFO	Strand	Type	gene	feature	cgi	feat.cgi	UCSC_Islands_Name	ALL_B beta SD	CTR beta SD
cg02579736	0.0825344	57.8094	4.73755e-41	3.79297e-35	73.1837	0.0462569	0.427171	0.380914	3	10068473	R	I	FANCD2	5'UTR	shore	5'UTR-shore	chr3:10067898-10068265	0.0116283	0.00877593
cg20810288	0.1382	34.2161	7.22881e-32	2.89376e-26	58.9792	0.0913253	0.583514	0.492189	1	19638859	R	I	PQLC2	1stExon	island	1stExon-island	chr1:19638207-19639309	0.0266076	0.0269645
cg06487943	0.115007	20.3689	4.07262e-23	8.15155e-18	41.7317	0.0820862	0.427759	0.345673	16	11319398	F	II		IGR	opensea	IGR-opensea		0.0220215	0.0765926
cg10125918	0.762096	-20.0362	7.55105e-23	1.2091e-17	41.1657	0.806769	0.337698	-0.469072	2	26497061	R	II	HADHB	Body	opensea	Body-opensea		0.0430559	0.0505116
cg26958740	0.827166	-19.8991	9.76171e-23	1.30257e-17	40.9298	0.859414	0.520813	-0.338601	4	124845769	R	II	LINC01091	Body	opensea	Body-opensea		0.0317403	0.0309831
cg06236715	0.827488	-19.7951	1.18729e-22	1.35795e-17	40.7498	0.869715	0.426333	-0.443382	1	171566880	R	II		IGR	opensea	IGR-opensea		0.0402826	0.0549431
cg24675644	0.81971	-18.5558	1.30848e-21	1.164e-16	38.5297	0.860884	0.428554	-0.432329	3	157163881	R	II	VEPH1	Body	opensea	Body-opensea		0.0426796	0.0515979
cg07099481	0.732804	-18.2821	2.26165e-21	1.50893e-16	38.0203	0.767057	0.4074	-0.359657	15	86237653	R	II	AKAP13	Body	opensea	Body-opensea		0.0380507	0.0201825
cg21762728	0.870741	-18.2108	2.61083e-21	1.60791e-16	37.8864	0.902369	0.570271	-0.332098	6	170165905	R	II	C6orf70	Body	opensea	Body-opensea		0.0321495	0.048108
cg16681109	0.806745	-18.1508	2.9475e-21	1.68559e-16	37.7733	0.838636	0.503774	-0.334862	10	101942078	F	II	ERLIN1	Body	shelf	Body-shelf	chr10:101945571-101945907	0.0309463	0.0576731
cg10777338	0.838204	-18.0326	3.74507e-21	1.99891e-16	37.5497	0.867927	0.555839	-0.312088	7	20936700	F	II	LINC01162	Body	opensea	Body-opensea		0.0320836	0.0335237
cg08303418	0.789236	-17.8897	5.01242e-21	2.50815e-16	37.2773	0.831185	0.39072	-0.440465	2	136993321	R	II		IGR	opensea	IGR-opensea		0.0451787	0.0541953
cg16802137	0.149218	17.5687	9.70833e-21	3.72762e-16	36.6584	0.117161	0.453768	0.336607	12	46660469	F	II	SLC38A1	TSS200	shore	TSS200-shore	chr12:46661054-46663408	0.0322498	0.0594901
cg17934775	0.161687	17.4594	1.21854e-20	4.09658e-16	36.4453	0.126767	0.493434	0.366667	15	93450129	R	II	CHD2	Body	shelf	Body-shelf	chr15:93447556-93447823	0.0353922	0.0653843
cg08649048	0.851901	-17.4361	1.27919e-20	4.09658e-16	36.3997	0.882268	0.563407	-0.318861	6	53026514	F	II		IGR	opensea	IGR-opensea		0.03142	0.0531455
cg24640583	0.136767	17.2085	2.06162e-20	6.11324e-16	35.9514	0.096996	0.51459	0.417594	22	41122692	F	II		IGR	opensea	IGR-opensea		0.0421356	0.0693946
cg21767619	0.137952	17.0961	2.61408e-20	7.47457e-16	35.7282	0.0926016	0.568782	0.476181	1	233059966	R	II		IGR	opensea	IGR-opensea		0.0481414	0.0814161
cg24178686	0.828291	-16.8451	4.46229e-20	1.10963e-15	35.2245	0.861098	0.516624	-0.344474	2	113458383	R	II		IGR	opensea	IGR-opensea		0.0366237	0.0508024
cg13053471	0.138155	16.8065	4.84715e-20	1.10963e-15	35.1465	0.10108	0.490364	0.389283	1	235147039	R	II		IGR	opensea	IGR-opensea		0.0411492	0.0603774
cg23485239	0.122619	16.8061	4.85089e-20	1.10963e-15	35.1458	0.0829829	0.499166	0.416184	16	12174262	R	II	SNX29	Body	opensea	Body-opensea		0.0412375	0.0802187
cg21455883	0.78675	-16.7585	5.37307e-20	1.15341e-15	35.0494	0.827574	0.398927	-0.428647	5	32148438	R	II	GOLPH3	Body	opensea	Body-opensea		0.0494485	0.0297978
cg15228224	0.142246	16.7498	5.47446e-20	1.15341e-15	35.0318	0.10017	0.541967	0.441797	5	89597261	R	II		IGR	opensea	IGR-opensea		0.0486992	0.0559615
cg14604976	0.829262	-16.7268	5.75296e-20	1.18101e-15	34.9849	0.860956	0.528169	-0.332787	1	77591712	R	II	PIGK	Body	opensea	Body-opensea		0.0362171	0.0450503
cg17304103	0.857885	-16.6667	6.54835e-20	1.27872e-15	34.8627	0.887961	0.572165	-0.315796	6	22113460	R	II	CASC15	Body	opensea	Body-opensea		0.0350172	0.0383411
cg12005818	0.118286	16.6239	7.18334e-20	1.33747e-15	34.7754	0.0787282	0.49408	0.415352	9	27367365	F	II	MOB3B	Body	opensea	Body-opensea		0.0473846	0.0408678
cg17351890	0.85685	-16.5739	8.00407e-20	1.45641e-15	34.6732	0.886963	0.570776	-0.316188	12	122720373	R	II	VPS33A	Body	opensea	Body-opensea		0.0337185	0.0500182
cg19149957	0.764577	-16.4654	1.0132e-19	1.72592e-15	34.4504	0.802717	0.402248	-0.400469	4	48245481	F	II	TEC	5'UTR	opensea	5'UTR-opensea		0.0427405	0.0665408
cg15928106	0.14004	16.391	1.1918e-19	1.90836e-15	34.2969	0.102449	0.497148	0.394698	7	130646078	F	II	FLJ43663	Body	opensea	Body-opensea		0.0450338	0.045603
cg03779251	0.879634	-16.3584	1.28015e-19	1.93379e-15	34.2292	0.910041	0.590773	-0.319268	6	35801652	F	II	SRPK1	3'UTR	opensea	3'UTR-opensea		0.0345865	0.0507032
cg22175624	0.31081	16.3387	1.33653e-19	1.94554e-15	34.1885	0.276723	0.634641	0.357918	17	80829261	R	I	TBCD	Body	shore	Body-shore	chr17:80829533-80829871	0.0418835	0.0309277
cg27346686	0.856152	-16.2691	1.55687e-19	2.07743e-15	34.044	0.884827	0.583743	-0.301084	1	116460865	F	II	LOC101928995	TSS1500	opensea	TSS1500-opensea		0.034738	0.0322382
cg00534516	0.861225	-16.2329	1.6861e-19	2.21118e-15	33.9685	0.89622	0.52877	-0.367451	5	118193625	F	II	DTWD2	Body	opensea	Body-opensea		0.0416577	0.0484473
cg10718056	0.852509	-16.2165	1.74799e-19	2.21118e-15	33.9344	0.88427	0.550773	-0.333498	6	28884599	F	II	TRIM27	Body	opensea	Body-opensea		0.0354863	0.0594723
cg26006714	0.842684	-16.2119	1.76588e-19	2.21118e-15	33.9247	0.874425	0.541147	-0.333278	10	73989551	R	II	ANAPC16	Body	opensea	Body-opensea		0.0387568	0.0349063
cg15137734	0.845385	-16.2019	1.80512e-19	2.2234e-15	33.9039	0.875083	0.563258	-0.311824	3	11703398	F	II	VGLL4	Body	opensea	Body-opensea		0.0329224	0.0569797
cg22082462	0.828052	-16.1686	1.9427e-19	2.2873e-15	33.8343	0.85811	0.542496	-0.315614	14	24540415	R	II	CPNE6	TSS1500	opensea	TSS1500-opensea		0.0367142	0.0336733
cg19746896	0.142811	16.1615	1.97348e-19	2.28987e-15	33.8195	0.109828	0.456148	0.34632	12	793773	F	II		IGR	opensea	IGR-opensea		0.0386891	0.0512907
cg09408629	0.128141	16.1185	2.17045e-19	2.41348e-15	33.7293	0.0916491	0.474815	0.383166	6	138192297	R	II	TNFAIP3	5'UTR	shelf	5'UTR-shelf	chr6:138187825-138189141	0.0349508	0.0958728
cg12205270	0.12249	16.0408	2.57852e-19	2.68105e-15	33.566	0.089863	0.43245	0.342587	17	76731088	F	II	CYTH1	Body	opensea	Body-opensea		0.0373893	0.0587904
cg00577668	0.844964	-15.9637	3.06124e-19	3.14217e-15	33.4032	0.876779	0.542726	-0.334053	8	96060712	F	II	NDUFAF6	Body	opensea	Body-opensea		0.0392504	0.037706
cg18897025	0.838988	-15.8902	3.60711e-19	3.52185e-15	33.2475	0.871858	0.526716	-0.345143	5	110413671	F	II	TSLP	3'UTR	opensea	3'UTR-opensea		0.040248	0.0439421
cg14022913	0.783546	-15.8672	3.79709e-19	3.65941e-15	33.1988	0.814916	0.485539	-0.329376	4	178229651	F	II	NEIL3	TSS1500	shore	TSS1500-shore	chr4:178230850-178231260	0.0369738	0.0530107
cg22395761	0.144963	15.8623	3.83941e-19	3.65941e-15	33.1882	0.106451	0.510827	0.404376	12	6553937	R	II	CD27	TSS200	opensea	TSS200-opensea		0.047164	0.0531325
cg25159832	0.802961	-15.8548	3.90373e-19	3.67694e-15	33.1725	0.841677	0.435158	-0.406519	1	179297012	F	II	SOAT1	5'UTR	opensea	5'UTR-opensea		0.0450694	0.0702751
cg06953293	0.769773	-15.6077	6.81134e-19	5.92748e-15	32.6434	0.806725	0.418729	-0.387996	10	62569076	R	II		IGR	opensea	IGR-opensea		0.04754	0.0360001
cg11648875	0.829839	-15.5832	7.20113e-19	6.09098e-15	32.5905	0.863166	0.513235	-0.349931	7	74106815	F	II	LOC101926943	Body	opensea	Body-opensea		0.0419458	0.042603
cg20107506	0.883041	-15.5655	7.49653e-19	6.25195e-15	32.5523	0.912996	0.598474	-0.314522	4	100874826	F	II		IGR	shelf	IGR-shelf	chr4:100870377-100871994	0.0345505	0.0601203
cg17847724	0.7963	-15.5491	7.7812e-19	6.30673e-15	32.5168	0.826051	0.513664	-0.312387	20	8638883	F	II	PLCB1	Body	opensea	Body-opensea		0.035723	0.0515515
cg27106078	0.1326	15.5253	8.21366e-19	6.44707e-15	32.4653	0.088438	0.552136	0.463698	21	36359863	F	II	RUNX1	Body	opensea	Body-opensea		0.0494088	0.0989204
cg06645335	0.818124	-15.4933	8.83282e-19	6.5005e-15	32.3961	0.853174	0.485145	-0.368029	6	11539475	F	II	TMEM170B	Body	shore	Body-shore	chr6:11537537-11538929	0.0436407	0.0516926
cg20731997	0.749673	-15.4906	8.8875e-19	6.5005e-15	32.3903	0.782774	0.435213	-0.347561	2	24125136	F	II	ATAD2B	Body	opensea	Body-opensea		0.0426261	0.0351709
cg15921351	0.128987	15.4877	8.94732e-19	6.5005e-15	32.3839	0.0883041	0.515473	0.427169	3	154829026	F	II	MME	Body	opensea	Body-opensea		0.0481073	0.0780914
cg05631664	0.871337	-15.4752	9.20425e-19	6.57955e-15	32.3569	0.901765	0.582272	-0.319493	5	55967501	F	II		IGR	opensea	IGR-opensea		0.0372563	0.0493639
cg07603078	0.141264	15.4656	9.40826e-19	6.60946e-15	32.3361	0.103757	0.497579	0.393822	13	101237377	F	II	GGACT	5'UTR	shelf	5'UTR-shelf	chr13:101240689-101241226	0.0437871	0.0754093
cg07413155	0.812606	-15.4409	9.95474e-19	6.81289e-15	32.2823	0.847132	0.484607	-0.362525	2	64242795	R	II	VPS54	5'UTR	shelf	5'UTR-shelf	chr2:64245934-64246893	0.0439692	0.0437424
cg06657721	0.187961	15.4408	9.95614e-19	6.81289e-15	32.2822	0.1532	0.518192	0.364992	6	25027618	R	I		IGR	opensea	IGR-opensea		0.0404237	0.070969
cg17333501	0.143107	15.426	1.02986e-18	6.92876e-15	32.25	0.106783	0.488188	0.381405	2	171508416	F	II	MYO3B	Body	opensea	Body-opensea		0.0477631	0.029082
cg10759796	0.126002	15.4181	1.04861e-18	6.93829e-15	32.2328	0.0895827	0.471985	0.382402	2	42802828	R	II	MTA3	5'UTR	opensea	5'UTR-opensea		0.0429832	0.071478
cg03580065	0.796661	-15.3788	1.14729e-18	7.52905e-15	32.1471	0.828571	0.493517	-0.335054	10	99183360	R	II		IGR	shelf	IGR-shelf	chr10:99185778-99186294	0.0413653	0.034233
cg05021589	0.129516	15.3154	1.32668e-18	8.33214e-15	32.0087	0.0952948	0.454618	0.359323	6	6588931	F	II	LY86	TSS200	opensea	TSS200-opensea		0.0436823	0.0460764
cg23954655	0.122476	15.3137	1.33211e-18	8.33214e-15	32.0048	0.090561	0.425668	0.335107	13	99223562	R	II	STK24	Body	opensea	Body-opensea		0.0388883	0.0567176
cg00660747	0.173751	15.2886	1.41122e-18	8.75853e-15	31.9498	0.143911	0.457226	0.313315	19	54882688	F	II	LAIR1	TSS1500	opensea	TSS1500-opensea		0.0382261	0.0388382
cg21519887	0.803329	-15.2476	1.55075e-18	9.1702e-15	31.8599	0.835734	0.495482	-0.340252	8	82470372	R	II		IGR	opensea	IGR-opensea		0.042866	0.0289688
cg14415410	0.818691	-15.229	1.61862e-18	9.27055e-15	31.8191	0.850807	0.513592	-0.337215	3	171848481	R	II	FNDC3B	Body	opensea	Body-opensea		0.0405002	0.0492715
cg09064352	0.805328	-15.226	1.62999e-18	9.27055e-15	31.8124	0.839589	0.479847	-0.359742	10	101414650	F	II		IGR	opensea	IGR-opensea		0.0436363	0.0495107
cg00789535	0.842625	-15.2252	1.63267e-18	9.27055e-15	31.8108	0.880891	0.479098	-0.401793	5	32539013	R	II		IGR	opensea	IGR-opensea		0.0491775	0.0520952
cg01523767	0.118127	15.1646	1.87824e-18	1.02296e-14	31.6772	0.0805465	0.475146	0.3946	8	123811301	R	II	ZHX2	5'UTR	opensea	5'UTR-opensea		0.0470151	0.0630071
cg10552523	0.108808	15.1336	2.01792e-18	1.08429e-14	31.6087	0.078153	0.400031	0.321878	11	313478	F	II	IFITM1	TSS1500	shelf	TSS1500-shelf	chr11:315739-316539	0.0345871	0.0723357
cg10958452	0.768567	-15.0786	2.29247e-18	1.2075e-14	31.487	0.801196	0.45859	-0.342605	1	44114346	R	II	KDM4A	TSS1500	shore	TSS1500-shore	chr1:44115616-44116309	0.0398713	0.0622467
cg10405645	0.100711	15.0677	2.35097e-18	1.22372e-14	31.4629	0.0693476	0.398662	0.329314	1	160407908	R	II		IGR	opensea	IGR-opensea		0.0224184	0.112981
cg12859943	0.862993	-15.0617	2.38401e-18	1.23141e-14	31.4496	0.894614	0.562591	-0.332023	6	86278303	R	II	SNX14	Body	opensea	Body-opensea		0.0383125	0.062475
cg12961175	0.836022	-15.055	2.4215e-18	1.23484e-14	31.4347	0.870344	0.509971	-0.360372	4	13615143	R	II	BOD1L1	ExonBnd	opensea	ExonBnd-opensea		0.0450116	0.0429271
cg23137881	0.859731	-15.0179	2.63938e-18	1.32071e-14	31.3524	0.888697	0.584554	-0.304143	4	159857583	F	II	C4orf45	Body	opensea	Body-opensea		0.0366248	0.047755
cg14456745	0.819969	-15.0018	2.74071e-18	1.35448e-14	31.3165	0.849953	0.535119	-0.314834	2	162085535	R	II	TANK	Body	opensea	Body-opensea		0.0391134	0.040229
cg04799410	0.148331	14.9913	2.80812e-18	1.3732e-14	31.2932	0.119392	0.423245	0.303853	3	187717711	R	II		IGR	opensea	IGR-opensea		0.032229	0.0719789
cg07235958	0.114103	14.9877	2.83225e-18	1.37427e-14	31.2851	0.0819634	0.41943	0.337466	1	155974953	R	II		IGR	opensea	IGR-opensea		0.0417447	0.0455675
cg24915409	0.825784	-14.9671	2.97118e-18	1.42442e-14	31.2393	0.854405	0.553884	-0.300522	4	78794450	F	II	MRPL1	Body	opensea	Body-opensea		0.0359027	0.0501781
cg20387122	0.783991	-14.9326	3.22096e-18	1.52589e-14	31.1622	0.820166	0.440331	-0.379835	6	134679535	R	II		IGR	opensea	IGR-opensea		0.0438759	0.074566
cg12009710	0.135446	14.9248	3.28044e-18	1.5359e-14	31.1447	0.100009	0.472096	0.372088	7	86848102	R	II	TMEM243	Body	shore	Body-shore	chr7:86848911-86850024	0.04735	0.0400029
cg03243118	0.750784	-14.9152	3.35443e-18	1.55238e-14	31.1234	0.780911	0.46458	-0.316331	15	31248573	R	II	MTMR10	Body	opensea	Body-opensea		0.0414055	0.0146398
cg00364028	0.856237	-14.8873	3.58117e-18	1.63837e-14	31.0609	0.889268	0.542448	-0.346819	5	150862717	R	II	SLC36A1	Body	opensea	Body-opensea		0.0425827	0.0523115
cg11483312	0.834267	-14.8459	3.94622e-18	1.79409e-14	30.9681	0.86617	0.53119	-0.33498	1	100294047	F	II		IGR	opensea	IGR-opensea		0.0410264	0.0521647
cg00840791	0.145104	14.8427	3.97538e-18	1.79409e-14	30.9611	0.109107	0.487081	0.377974	19	16453259	F	II		IGR	opensea	IGR-opensea		0.0384876	0.099148
cg03156546	0.7505	-14.8413	3.98877e-18	1.79409e-14	30.9579	0.783998	0.432274	-0.351723	16	24759640	R	II	TNRC6A	Body	opensea	Body-opensea		0.0442389	0.0455551
cg16000803	0.835141	-14.8336	4.06173e-18	1.80661e-14	30.9405	0.863789	0.56298	-0.300809	7	32619660	F	II	AVL9	Body	opensea	Body-opensea		0.0373867	0.0422556
cg25605731	0.843017	-14.7328	5.14963e-18	2.14734e-14	30.7135	0.875889	0.530726	-0.345163	19	13054434	R	I	CALR	Body	shelf	Body-shelf	chr19:13056458-13057125	0.0426171	0.0542057
cg19969670	0.828417	-14.718	5.3329e-18	2.1771e-14	30.6801	0.860853	0.520275	-0.340578	15	64922845	F	II	ZNF609	Body	opensea	Body-opensea		0.0451321	0.0184978
cg02160684	0.790929	-14.6737	5.92079e-18	2.31234e-14	30.58	0.821163	0.503703	-0.31746	8	126448033	R	II	TRIB1	Body	shelf	Body-shelf	chr8:126444232-126444440	0.0388465	0.0533405
cg21407040	0.117358	14.6345	6.49613e-18	2.48848e-14	30.4912	0.0851449	0.423386	0.338241	16	11764338	R	II	SNN	5'UTR	shore	5'UTR-shore	chr16:11762563-11763246	0.0419456	0.0541315
cg03964681	0.846001	-14.6113	6.8636e-18	2.60433e-14	30.4386	0.882637	0.497966	-0.384671	13	32699995	F	II	FRY	Body	opensea	Body-opensea		0.0481425	0.0595565
cg01861537	0.771867	-14.6093	6.89757e-18	2.60487e-14	30.4338	0.805457	0.45276	-0.352698	11	121507724	R	II		IGR	opensea	IGR-opensea		0.0445932	0.0506558
cg27506975	0.826395	-14.6055	6.96015e-18	2.61616e-14	30.4252	0.855868	0.546398	-0.30947	1	180023244	R	II	CEP350	Body	opensea	Body-opensea		0.0400519	0.0350755
cg10641505	0.80179	-14.5869	7.2735e-18	2.66242e-14	30.383	0.830619	0.527911	-0.302708	12	48463278	F	II	SENP1	Body	opensea	Body-opensea		0.0378804	0.0464297
cg11340328	0.788066	-14.5845	7.31599e-18	2.66242e-14	30.3774	0.819092	0.493316	-0.325776	3	153011352	F	II		IGR	opensea	IGR-opensea		0.0422744	0.0368013
cg06815311	0.815867	-14.576	7.46377e-18	2.70391e-14	30.3583	0.846962	0.520465	-0.326497	17	49309456	F	II	MBTD1	5'UTR	opensea	5'UTR-opensea		0.0419807	0.041151
cg03211711	0.838212	-14.5716	7.54239e-18	2.71093e-14	30.3482	0.870652	0.530032	-0.340621	2	32491049	F	II	NLRC4	TSS1500	opensea	TSS1500-opensea		0.0437724	0.0435693
cg04312209	0.118387	14.5712	7.55087e-18	2.71093e-14	30.3472	0.085692	0.428994	0.343302	5	35857130	F	II	IL7R	1stExon	opensea	1stExon-opensea		0.0437281	0.0475202
cg23954865	0.853522	-14.5385	8.16171e-18	2.82875e-14	30.2727	0.888521	0.521032	-0.367489	16	30497246	R	II	ITGAL	Body	opensea	Body-opensea		0.0458599	0.0597246
cg26312951	0.130463	14.5002	8.94065e-18	2.96956e-14	30.1853	0.0979141	0.439679	0.341765	21	42797847	R	II	MX1	TSS200	shore	TSS200-shore	chr21:42798146-42798884	0.0451325	0.0329991
cg14339738	0.805671	-14.4968	9.01307e-18	2.96956e-14	30.1776	0.837112	0.506987	-0.330125	8	117672859	F	II	EIF3H	Body	opensea	Body-opensea		0.0382447	0.0718875
cg24597564	0.798749	-14.4797	9.39033e-18	3.0686e-14	30.1383	0.829866	0.503131	-0.326736	5	58426442	F	II	PDE4D	Body	opensea	Body-opensea		0.0397754	0.060693
cg06314189	0.741618	-14.4667	9.68623e-18	3.13967e-14	30.1086	0.774278	0.431347	-0.342931	10	35580925	R	II	CCNY	5'UTR	opensea	5'UTR-opensea		0.0451629	0.036071
cg19055828	0.827508	-14.4569	9.91505e-18	3.20088e-14	30.0862	0.856605	0.55109	-0.305515	12	51139321	F	II	DIP2B	3'UTR	opensea	3'UTR-opensea		0.0382821	0.0495903
cg02205015	0.139201	14.4521	1.00292e-17	3.22473e-14	30.0752	0.109415	0.422168	0.312754	19	7413482	R	II		IGR	opensea	IGR-opensea		0.038206	0.0576529
cg20164557	0.842121	-14.4424	1.02651e-17	3.27932e-14	30.0529	0.876839	0.512292	-0.364548	4	184916766	R	II	STOX2	Body	opensea	Body-opensea		0.0452927	0.063178
cg18677212	0.865675	-14.4398	1.03297e-17	3.27932e-14	30.0469	0.89519	0.58528	-0.30991	9	3264870	F	II	RFX3	Body	opensea	Body-opensea		0.0400757	0.0405824
cg08835163	0.860361	-14.4115	1.10521e-17	3.42966e-14	29.9821	0.889949	0.579277	-0.310671	20	34475554	R	II	PHF20	Body	opensea	Body-opensea		0.03745	0.0610962
cg22740441	0.128755	14.4097	1.10996e-17	3.43111e-14	29.978	0.0962905	0.437169	0.340878	4	102249652	R	II	PPP3CA	Body	opensea	Body-opensea		0.0405752	0.0703684
cg04406863	0.125743	14.3973	1.14357e-17	3.52141e-14	29.9494	0.0920051	0.446254	0.354249	20	62177351	R	II	SRMS	Body	shore	Body-shore	chr20:62178442-62179183	0.0471589	0.0342173
cg22623649	0.843769	-14.3894	1.16526e-17	3.54727e-14	29.9314	0.874531	0.551523	-0.323009	8	99179021	R	II		IGR	opensea	IGR-opensea		0.0418841	0.0430192
cg06824443	0.804934	-14.3787	1.19561e-17	3.62588e-14	29.9067	0.837057	0.49976	-0.337297	2	9255593	F	II		IGR	opensea	IGR-opensea		0.0443867	0.0390849
cg00592949	0.129004	14.3716	1.21631e-17	3.65913e-14	29.8903	0.099528	0.409031	0.309503	9	112680911	F	II	PALM2	Body	opensea	Body-opensea		0.0376281	0.0597615
cg26776547	0.828022	-14.3563	1.26182e-17	3.76953e-14	29.855	0.861373	0.511185	-0.350188	1	120327345	F	II		IGR	opensea	IGR-opensea		0.0447842	0.053451
cg20090759	0.85948	-14.344	1.29944e-17	3.85318e-14	29.8269	0.895419	0.518058	-0.377361	21	15964265	R	II	LOC388813	3'UTR	opensea	3'UTR-opensea		0.0492428	0.0499183
cg19787543	0.864903	-14.3326	1.33564e-17	3.917e-14	29.8005	0.896149	0.568072	-0.328076	16	17416019	F	II	XYLT1	Body	opensea	Body-opensea		0.0424887	0.0459742
cg06168950	0.771345	-14.3063	1.42288e-17	4.11259e-14	29.7398	0.801333	0.486455	-0.314878	3	154737057	F	II		IGR	opensea	IGR-opensea		0.0426431	0.0227137
cg13779854	0.798395	-14.286	1.49436e-17	4.30364e-14	29.6928	0.831832	0.480741	-0.351092	3	127496919	F	II	MGLL	Body	opensea	Body-opensea		0.0465079	0.0411891
cg17364089	0.131233	14.1926	1.87205e-17	4.996e-14	29.4765	0.0974106	0.452547	0.355136	21	40139776	F	II	LINC00114	Body	opensea	Body-opensea		0.046074	0.0538815
cg24818200	0.781423	-14.1677	1.98844e-17	5.1966e-14	29.4186	0.812127	0.489735	-0.322392	5	140501365	R	II	PCDHB4	TSS1500	shore	TSS1500-shore	chr5:140502890-140503804	0.0415129	0.0516043
cg06864259	0.760944	-14.1631	2.01089e-17	5.21021e-14	29.4078	0.79534	0.434178	-0.361162	2	40895806	R	II		IGR	opensea	IGR-opensea		0.0436069	0.0768392
cg01438390	0.847414	-14.0868	2.41987e-17	6.06125e-14	29.23	0.876673	0.569454	-0.307219	1	8166942	F	II		IGR	opensea	IGR-opensea		0.0379031	0.0617669
cg06373940	0.847609	-14.0814	2.4524e-17	6.11663e-14	29.2172	0.877256	0.565955	-0.311301	2	128052778	F	II	ERCC3	TSS1500	shore	TSS1500-shore	chr2:128051347-128051857	0.0414473	0.0403931
cg25631747	0.140402	14.073	2.50286e-17	6.22309e-14	29.1976	0.110603	0.423496	0.312894	6	4781882	R	II	CDYL	Body	opensea	Body-opensea		0.0374732	0.0694252
cg04645556	0.847047	-14.0698	2.52247e-17	6.23313e-14	29.1901	0.875619	0.575606	-0.300013	20	8638980	F	II	PLCB1	Body	opensea	Body-opensea		0.0384973	0.0510237
cg13394762	0.809448	-14.0448	2.68045e-17	6.52285e-14	29.1318	0.844455	0.476879	-0.367576	14	103871452	R	II	MARK3	Body	opensea	Body-opensea		0.0486377	0.0528025
cg12423097	0.788575	-14.0366	2.73468e-17	6.59468e-14	29.1125	0.818818	0.50127	-0.317548	3	71151690	F	II	FOXP1	Body	opensea	Body-opensea		0.0418948	0.0462206
cg12137458	0.88285	-14.0136	2.89259e-17	6.89244e-14	29.0586	0.912175	0.604262	-0.307912	11	78539809	F	II	TENM4	Body	opensea	Body-opensea		0.0391213	0.0564832
cg21592454	0.789951	-14.01	2.9182e-17	6.93284e-14	29.0501	0.821561	0.489654	-0.331907	7	36639726	F	II	AOAH-IT1	TSS200	opensea	TSS200-opensea		0.0413169	0.0666014
cg14187466	0.832381	-13.9932	3.04027e-17	7.18022e-14	29.0107	0.865836	0.514564	-0.351272	15	75919788	F	II	SNUPN	TSS1500	shore	TSS1500-shore	chr15:75917646-75918212	0.0435548	0.0721012
cg15243027	0.864193	-13.992	3.04923e-17	7.18022e-14	29.0079	0.893403	0.586691	-0.306712	2	32784469	F	II	BIRC6-AS2	Body	opensea	Body-opensea		0.0387865	0.0579076
cg17039883	0.863131	-13.9806	3.13527e-17	7.3373e-14	28.9811	0.896895	0.54238	-0.354515	17	3738423	F	II	C17orf85	Body	opensea	Body-opensea		0.0446044	0.0692683
cg12093275	0.190061	13.9683	3.23155e-17	7.49924e-14	28.952	0.154664	0.526339	0.371675	2	42483979	R	II	EML4	Body	opensea	Body-opensea		0.0489718	0.0577702
cg25725023	0.841421	-13.963	3.27301e-17	7.52999e-14	28.9398	0.873066	0.540792	-0.332274	1	24797333	R	II	NIPAL3	3'UTR	opensea	3'UTR-opensea		0.0411511	0.0689423
cg20642178	0.81159	-13.9466	3.4074e-17	7.75257e-14	28.9011	0.846763	0.477449	-0.369314	1	179895327	R	II		IGR	opensea	IGR-opensea		0.0475507	0.0662371
cg16237475	0.135437	13.9109	3.71934e-17	8.33702e-14	28.8169	0.100492	0.467419	0.366927	1	231351310	R	II	TRIM67	3'UTR	opensea	3'UTR-opensea		0.0495025	0.0488255
cg18938128	0.826513	-13.9099	3.72793e-17	8.33702e-14	28.8147	0.859932	0.50904	-0.350892	16	3331537	F	II		IGR	shore	IGR-shore	chr16:3332472-3333847	0.0474037	0.0458621
cg14592365	0.12408	13.8958	3.85952e-17	8.56433e-14	28.7813	0.088796	0.459275	0.370479	11	111288100	R	II		IGR	opensea	IGR-opensea		0.0464843	0.0754835
cg06147190	0.850526	-13.8892	3.92202e-17	8.65848e-14	28.7658	0.881372	0.55749	-0.323881	9	127143971	F	II	PSMB7	Body	opensea	Body-opensea		0.0414569	0.0606172
cg14520947	0.835694	-13.8231	4.61512e-17	9.87956e-14	28.6093	0.869433	0.515176	-0.354257	1	225942842	R	II		IGR	opensea	IGR-opensea		0.0464545	0.0609195
cg02485174	0.789908	-13.8169	4.68562e-17	9.97712e-14	28.5947	0.822737	0.478033	-0.344704	10	26792038	F	II	APBB1IP	Body	opensea	Body-opensea		0.0466081	0.0478978
cg20083463	0.714612	-13.8141	4.71779e-17	9.99246e-14	28.5881	0.748704	0.390744	-0.357959	21	39601779	R	I	KCNJ15	TSS200	opensea	TSS200-opensea		0.0473356	0.058929
cg00018276	0.860454	-13.7918	4.98485e-17	1.0475e-13	28.5351	0.89321	0.549267	-0.343944	9	107954218	F	II		IGR	opensea	IGR-opensea		0.0466391	0.0474209
cg22637658	0.113336	13.7771	5.16908e-17	1.07493e-13	28.5002	0.0785126	0.444155	0.365643	21	37368048	R	II	LOC101928269	Body	opensea	Body-opensea		0.0490489	0.055944
cg07853082	0.848662	-13.7748	5.19869e-17	1.07794e-13	28.4947	0.881396	0.53769	-0.343706	1	152010737	R	II	S100A11	TSS1500	shore	TSS1500-shore	chr1:152008838-152009112	0.0463979	0.0498714
cg21221767	0.109733	13.7659	5.3135e-17	1.09079e-13	28.4737	0.077829	0.41282	0.334991	14	65673646	F	II		IGR	opensea	IGR-opensea		0.0392907	0.0844969
cg10867951	0.112498	13.7463	5.57748e-17	1.13914e-13	28.427	0.0834244	0.388703	0.305278	4	6900693	R	II		IGR	opensea	IGR-opensea		0.0428712	0.0256396
cg15156941	0.120853	13.7393	5.67473e-17	1.15312e-13	28.4104	0.0905007	0.409203	0.318703	15	76578733	R	II	ETFA	Body	opensea	Body-opensea		0.0420794	0.0544817
cg24732404	0.78398	-13.7244	5.8875e-17	1.18666e-13	28.3749	0.815677	0.482856	-0.332821	20	8225365	R	II	PLCB1	Body	opensea	Body-opensea		0.0443891	0.0541636
cg24055594	0.157705	13.7209	5.93836e-17	1.18666e-13	28.3667	0.12239	0.493201	0.370811	4	2815386	R	II	SH3BP2	5'UTR	opensea	5'UTR-opensea		0.0444538	0.0904423
cg17722508	0.135449	13.705	6.17767e-17	1.22123e-13	28.3286	0.10011	0.471161	0.371051	1	31228006	F	II	LAPTM5	Body	opensea	Body-opensea		0.0491004	0.0644103
cg19547773	0.847244	-13.6659	6.80574e-17	1.31455e-13	28.2354	0.877545	0.55938	-0.318165	6	136997361	R	II	MAP3K5	Body	opensea	Body-opensea		0.0427291	0.0509151
cg21958120	0.814625	-13.6605	6.89724e-17	1.32424e-13	28.2225	0.844946	0.526571	-0.318375	6	136901054	F	II	MAP3K5	Body	opensea	Body-opensea		0.0419591	0.0570475
cg05177308	0.831354	-13.6551	6.99075e-17	1.3326e-13	28.2095	0.861984	0.540365	-0.321619	12	106674076	R	II		IGR	opensea	IGR-opensea		0.0418398	0.0614837
cg11389756	0.814044	-13.6356	7.33778e-17	1.3823e-13	28.1629	0.844184	0.527718	-0.316466	6	28875354	R	II	TRIM27	Body	opensea	Body-opensea		0.0414419	0.0591217
cg02832512	0.808007	-13.5963	8.0918e-17	1.48248e-13	28.0686	0.839377	0.509994	-0.329383	6	22113516	R	II	FLJ22536	Body	opensea	Body-opensea		0.0471264	0.0225818
cg07838278	0.759738	-13.5828	8.36884e-17	1.51589e-13	28.0362	0.792315	0.45026	-0.342055	5	122765825	F	II		IGR	opensea	IGR-opensea		0.0452491	0.0626026
cg06524923	0.768568	-13.5778	8.4718e-17	1.52763e-13	28.0244	0.801261	0.457978	-0.343283	2	28291160	R	II	BRE	Body	opensea	Body-opensea		0.0458724	0.0597217
cg12196294	0.839845	-13.4724	1.10249e-16	1.88203e-13	27.7705	0.870178	0.551678	-0.3185	3	129575053	F	II	TMCC1	5'UTR	opensea	5'UTR-opensea		0.0446645	0.0401692
cg10914422	0.850311	-13.4656	1.12153e-16	1.90257e-13	27.754	0.881731	0.551822	-0.329909	8	22942730	R	II	LOC254896	Body	opensea	Body-opensea		0.0469533	0.0340957
cg18587674	0.833989	-13.4592	1.13952e-16	1.92068e-13	27.7387	0.866605	0.524132	-0.342473	3	23919329	F	II	UBE2E1	Body	opensea	Body-opensea		0.0496257	0.021656
cg00439981	0.878771	-13.4535	1.15594e-16	1.93478e-13	27.7249	0.910781	0.574671	-0.33611	6	170684299	R	II	FAM120B	Body	shore	Body-shore	chr6:170686006-170687003	0.0455812	0.0570867
cg10408731	0.792183	-13.4465	1.17638e-16	1.95274e-13	27.708	0.821389	0.514724	-0.306666	7	65214843	F	II	CCT6P1	TSS1500	shore	TSS1500-shore	chr7:65215732-65216495	0.0416734	0.0512124
cg01447475	0.115567	13.424	1.24456e-16	2.04604e-13	27.6536	0.0829306	0.425616	0.342685	2	30510887	R	II		IGR	opensea	IGR-opensea		0.0390749	0.0975516
cg01410116	0.107208	13.4232	1.24721e-16	2.04619e-13	27.6516	0.0783778	0.38109	0.302712	6	2859460	R	II	SERPINB9P1	Body	opensea	Body-opensea		0.042365	0.0404934
cg15010903	0.780147	-13.3876	1.36403e-16	2.20032e-13	27.5652	0.810885	0.488134	-0.322751	17	76850256	R	II	TIMP2	3'UTR	shore	3'UTR-shore	chr17:76851759-76851973	0.0452736	0.0438685
cg00010853	0.141946	13.3851	1.37253e-16	2.20657e-13	27.5592	0.113227	0.414778	0.301551	6	30653167	F	II	KIAA1949	Body	shore	Body-shore	chr6:30654392-30654934	0.042818	0.0351484
cg02309841	0.811947	-13.3811	1.38619e-16	2.22407e-13	27.5497	0.843096	0.516031	-0.327065	3	11758425	R	II	VGLL4	5'UTR	shelf	5'UTR-shelf	chr3:11760638-11762078	0.0427686	0.0679973
cg25863967	0.79795	-13.3294	1.57908e-16	2.48867e-13	27.424	0.829035	0.502649	-0.326386	7	130049683	F	II	TSGA14	Body	opensea	Body-opensea		0.0470696	0.0321391
cg11492019	0.823352	-13.3261	1.59215e-16	2.49942e-13	27.416	0.853573	0.536251	-0.317322	15	91305449	R	II	BLM	Body	opensea	Body-opensea		0.0437436	0.051859
cg03865101	0.834509	-13.2898	1.74495e-16	2.69687e-13	27.3276	0.865575	0.539385	-0.32619	12	1883663	F	II	ADIPOR2	Body	opensea	Body-opensea		0.045325	0.0516772
cg13877316	0.820784	-13.2829	1.77571e-16	2.7235e-13	27.3107	0.854601	0.499517	-0.355084	4	113107409	F	II	C4orf32	Body	opensea	Body-opensea		0.0487813	0.0613218
cg08936230	0.121963	13.2212	2.07563e-16	3.08883e-13	27.1601	0.0892945	0.432311	0.343016	7	2079167	R	II	MAD1L1	Body	opensea	Body-opensea		0.0414185	0.0923202
cg12058385	0.850757	-13.2168	2.09927e-16	3.11243e-13	27.1491	0.88109	0.562587	-0.318503	2	144448686	F	II	ARHGAP15	Body	opensea	Body-opensea		0.0443079	0.0522361
cg03006193	0.12669	13.1902	2.24565e-16	3.30498e-13	27.084	0.09526	0.425279	0.330019	7	2078036	R	II	MAD1L1	Body	opensea	Body-opensea		0.0461121	0.0535271
cg12048965	0.138666	13.1789	2.31123e-16	3.37666e-13	27.0562	0.106007	0.448919	0.342912	10	3848384	F	II		IGR	opensea	IGR-opensea		0.0453578	0.0736322
cg21055045	0.131724	13.1683	2.37431e-16	3.45622e-13	27.0302	0.0986954	0.445498	0.346803	2	47266465	F	II	TTC7A	Body	opensea	Body-opensea		0.0497605	0.0453934
cg26802813	0.125648	13.1658	2.38945e-16	3.46578e-13	27.0241	0.0942878	0.423574	0.329286	3	47014128	R	II	CCDC12	Body	shelf	Body-shelf	chr3:47017879-47018312	0.0443268	0.0661957
cg23368104	0.684658	-13.1482	2.49828e-16	3.58841e-13	26.9811	0.715618	0.390539	-0.325079	10	74271297	F	II	MICU1	Body	opensea	Body-opensea		0.0472879	0.0356876
cg07381806	0.193833	13.1259	2.64405e-16	3.74006e-13	26.9263	0.165002	0.467731	0.302729	19	2094327	F	I	MOBKL2A	5'UTR	shore	5'UTR-shore	chr19:2095395-2095727	0.0419088	0.0536192
cg08017851	0.122164	13.0721	3.03314e-16	4.17967e-13	26.7937	0.091281	0.41555	0.324269	13	41054902	F	II	LINC00598	Body	opensea	Body-opensea		0.0466088	0.0450645
cg00705730	0.849562	-13.013	3.5274e-16	4.7147e-13	26.6477	0.879729	0.562973	-0.316756	2	106438120	R	II	NCK2	5'UTR	opensea	5'UTR-opensea		0.0447703	0.0526865
cg24504349	0.856484	-13.0109	3.54633e-16	4.72422e-13	26.6426	0.889394	0.543843	-0.34555	4	120974344	R	II		IGR	opensea	IGR-opensea		0.0468655	0.0718043
cg04185197	0.842751	-12.9992	3.65447e-16	4.82016e-13	26.6135	0.872296	0.562076	-0.310221	7	156930564	F	II	UBE3C	TSS1500	shore	TSS1500-shore	chr7:156931422-156932075	0.0421859	0.0636744
cg18825221	0.0945751	12.997	3.67482e-16	4.83109e-13	26.6082	0.0656667	0.369204	0.303537	14	68749962	R	II	RAD51L1	Body	opensea	Body-opensea		0.0366143	0.0856025
cg14685461	0.851007	-12.991	3.73172e-16	4.88184e-13	26.5933	0.882602	0.550849	-0.331753	3	113830265	F	II		IGR	opensea	IGR-opensea		0.047591	0.0502253
cg06794642	0.796158	-12.9798	3.84102e-16	4.9841e-13	26.5654	0.825212	0.520148	-0.305064	17	1001605	F	II	ABR	Body	opensea	Body-opensea		0.0435876	0.0476883
cg24697460	0.83191	-12.9672	3.96661e-16	5.11391e-13	26.5343	0.861558	0.55025	-0.311308	12	124908653	F	II	NCOR2	Body	shelf	Body-shelf	chr12:124911243-124911464	0.0456031	0.0381975
cg10831427	0.825278	-12.9657	3.98255e-16	5.12621e-13	26.5304	0.856436	0.52928	-0.327156	2	65594760	F	II	SPRED2	TSS1500	opensea	TSS1500-opensea		0.0481524	0.0378932
cg00849335	0.809994	-12.9539	4.10431e-16	5.22414e-13	26.5013	0.841953	0.506382	-0.335571	1	66736380	F	II	PDE4B	Body	opensea	Body-opensea		0.0484598	0.049344
cg02538681	0.862654	-12.939	4.26492e-16	5.36883e-13	26.4642	0.894491	0.560205	-0.334285	10	90611911	R	II	ANKRD22	TSS200	opensea	TSS200-opensea		0.0484466	0.0480951
cg07487555	0.11086	12.9033	4.67433e-16	5.73103e-13	26.3755	0.0821862	0.383263	0.301077	1	9778058	R	II	PIK3CD	Body	shelf	Body-shelf	chr1:9775708-9775997	0.0447867	0.0311661
cg04349665	0.119788	12.8825	4.93115e-16	6.01825e-13	26.3238	0.0902791	0.40012	0.309841	12	3383362	F	II	TSPAN9	Body	opensea	Body-opensea		0.0469228	0.0194316
cg14647416	0.825962	-12.8804	4.95865e-16	6.04261e-13	26.3184	0.858379	0.517999	-0.34038	5	179027133	R	II	RUFY1	Body	opensea	Body-opensea		0.049113	0.0533441
cg13221508	0.825589	-12.8607	5.21636e-16	6.31818e-13	26.2694	0.855403	0.542359	-0.313045	21	27513425	F	II	APP	TSS1500	opensea	TSS1500-opensea		0.0437727	0.0601201
cg04353863	0.833628	-12.8543	5.30373e-16	6.39498e-13	26.2533	0.863723	0.547729	-0.315994	8	125557455	F	II	NDUFB9	Body	opensea	Body-opensea		0.0441441	0.0611929
cg05745656	0.118412	12.8507	5.35222e-16	6.42442e-13	26.2445	0.0886738	0.400927	0.312254	6	22271391	F	II		IGR	opensea	IGR-opensea		0.027515	0.120612
cg26209169	0.11823	12.8388	5.51978e-16	6.57991e-13	26.2147	0.0886877	0.398885	0.310197	5	1316264	R	II		IGR	opensea	IGR-opensea		0.0464513	0.031509
cg01554751	0.113012	12.8305	5.639e-16	6.69835e-13	26.194	0.0815982	0.411444	0.329846	6	167512456	R	II		IGR	opensea	IGR-opensea		0.0428186	0.0833532
cg21293813	0.854214	-12.8206	5.78531e-16	6.85181e-13	26.1692	0.883568	0.575349	-0.308219	4	147065211	F	II		IGR	opensea	IGR-opensea		0.0415765	0.0696711
cg18523477	0.112164	12.8121	5.91318e-16	6.92135e-13	26.1481	0.0834605	0.384851	0.301391	20	55967503	R	II	RBM38	Body	shore	Body-shore	chr20:55966212-55966964	0.0426751	0.0553038
cg19196676	0.816978	-12.7781	6.45748e-16	7.41747e-13	26.0629	0.846224	0.539148	-0.307075	12	45598674	R	II	PLEKHA8P1	Body	opensea	Body-opensea		0.0424723	0.0642006
cg12622973	0.869778	-12.7648	6.68345e-16	7.61152e-13	26.0296	0.900732	0.575715	-0.325018	1	203562198	R	II		IGR	opensea	IGR-opensea		0.0485773	0.0384555
cg07120158	0.78961	-12.7271	7.36945e-16	8.17192e-13	25.935	0.822236	0.479671	-0.342564	12	32638669	F	II	FGD4	TSS1500	opensea	TSS1500-opensea		0.0479512	0.0699311
cg21335396	0.82484	-12.7002	7.90204e-16	8.70223e-13	25.8674	0.857605	0.513572	-0.344033	9	4904699	F	II		IGR	opensea	IGR-opensea		0.0493479	0.0628229
cg27185152	0.130749	12.6924	8.06359e-16	8.83674e-13	25.8478	0.098444	0.437651	0.339207	7	36829993	F	II		IGR	opensea	IGR-opensea		0.0497127	0.0536126
cg21421707	0.841534	-12.6435	9.15904e-16	9.88001e-13	25.7245	0.871949	0.552593	-0.319356	11	47517145	F	II	CELF1	TSS1500	opensea	TSS1500-opensea		0.0449156	0.0659294
cg16151423	0.806434	-12.6431	9.16896e-16	9.88001e-13	25.7234	0.836609	0.519774	-0.316834	14	91504953	F	II	RPS6KA5	Body	opensea	Body-opensea		0.0445894	0.0652049
cg08347063	0.826239	-12.5869	1.06164e-15	1.10474e-12	25.5814	0.854821	0.554703	-0.300118	9	3257092	F	II	RFX3	Body	opensea	Body-opensea		0.0451714	0.0392386
cg25479497	0.84208	-12.5845	1.06815e-15	1.1079e-12	25.5755	0.874293	0.536062	-0.338231	4	2665187	R	II	FAM193A	Body	opensea	Body-opensea		0.0496342	0.0570188
cg05359652	0.862915	-12.57	1.10961e-15	1.14482e-12	25.5386	0.892241	0.584312	-0.307929	1	200112638	F	II	NR5A2	Body	opensea	Body-opensea		0.0449282	0.0540799
cg13242717	0.846564	-12.559	1.14185e-15	1.1738e-12	25.5109	0.877907	0.548809	-0.329098	18	29667208	R	II		IGR	opensea	IGR-opensea		0.0494674	0.0455871
cg02465404	0.845134	-12.5589	1.1421e-15	1.1738e-12	25.5106	0.875549	0.556194	-0.319355	6	55802241	R	II		IGR	opensea	IGR-opensea		0.0483834	0.0399239
cg01246178	0.821564	-12.5334	1.22114e-15	1.2407e-12	25.4458	0.85232	0.529378	-0.322942	3	107377077	R	II	BBX	5'UTR	opensea	5'UTR-opensea		0.0478191	0.0524832
cg00108554	0.164826	12.5284	1.237e-15	1.25184e-12	25.4333	0.135449	0.44391	0.308462	16	73157200	F	II		IGR	opensea	IGR-opensea		0.0468195	0.0387634
cg23965049	0.863809	-12.5277	1.23953e-15	1.25184e-12	25.4313	0.892532	0.590944	-0.301587	2	207993750	F	II	KLF7	Body	opensea	Body-opensea		0.0428171	0.062595
cg03776905	0.836742	-12.5242	1.25063e-15	1.25789e-12	25.4227	0.867633	0.543272	-0.324361	6	86295700	R	II	SNX14	5'UTR	opensea	5'UTR-opensea		0.0487423	0.0464948
cg11557901	0.874359	-12.48	1.40448e-15	1.3831e-12	25.3102	0.905345	0.579997	-0.325348	9	128022358	F	II		IGR	shore	IGR-shore	chr9:128023933-128024596	0.0482998	0.0538563
cg16830475	0.823184	-12.4612	1.4755e-15	1.43762e-12	25.2624	0.854745	0.523351	-0.331394	21	45059858	F	II	HSF2BP	Body	opensea	Body-opensea		0.0494289	0.0536772
cg13048113	0.869283	-12.4419	1.55234e-15	1.49379e-12	25.2132	0.900439	0.573301	-0.327138	2	176326848	R	II		IGR	opensea	IGR-opensea		0.0493607	0.0485038
cg11298010	0.161139	12.4385	1.56651e-15	1.50381e-12	25.2044	0.132531	0.432921	0.30039	1	229474175	F	II	CCSAP	Body	shelf	Body-shelf	chr1:229478014-229478935	0.040875	0.0748298
cg15044453	0.834079	-12.3916	1.77243e-15	1.65582e-12	25.0846	0.864547	0.544629	-0.319918	6	151258520	R	II	MTHFD1L	Body	opensea	Body-opensea		0.0481213	0.0507611
cg09432376	0.129355	12.3744	1.85459e-15	1.71854e-12	25.0407	0.0982419	0.42493	0.326688	22	36044226	R	II	APOL6	TSS200	opensea	TSS200-opensea		0.0482756	0.0597444
cg23582644	0.832801	-12.3094	2.20223e-15	1.98406e-12	24.874	0.862452	0.551122	-0.31133	18	61557687	F	II	SERPINB2	5'UTR	opensea	5'UTR-opensea		0.0489388	0.0286828
cg03718013	0.809937	-12.3092	2.20308e-15	1.98406e-12	24.8736	0.839952	0.524798	-0.315154	14	103871417	R	II	MARK3	ExonBnd	opensea	ExonBnd-opensea		0.0476774	0.0506962
cg15001032	0.176022	12.2911	2.31121e-15	2.0469e-12	24.8271	0.144335	0.477055	0.332721	7	50632994	F	II	DDC	5'UTR	opensea	5'UTR-opensea		0.0498731	0.0584275
cg11330406	0.833077	-12.2581	2.52236e-15	2.18319e-12	24.7423	0.865328	0.526697	-0.338631	20	1550119	R	II	SIRPB1	Body	opensea	Body-opensea		0.0492995	0.0713094
cg25800638	0.813732	-12.2508	2.57171e-15	2.21394e-12	24.7235	0.842746	0.538095	-0.304651	2	24527092	F	I	ITSN2	Body	opensea	Body-opensea		0.0468094	0.0443476
cg19948478	0.86667	-12.2382	2.65933e-15	2.27712e-12	24.691	0.896563	0.582681	-0.313882	1	235010536	F	II		IGR	opensea	IGR-opensea		0.0474678	0.0533351
cg26521143	0.784004	-12.2344	2.68639e-15	2.29539e-12	24.6811	0.814031	0.498738	-0.315294	12	6402009	R	II		IGR	shore	IGR-shore	chr12:6399262-6400771	0.0470578	0.0587298
cg23506143	0.792851	-12.2192	2.79685e-15	2.37456e-12	24.642	0.823371	0.502917	-0.320454	5	55761274	R	I		IGR	opensea	IGR-opensea		0.045114	0.0776612
cg14782541	0.826844	-12.0755	4.10348e-15	3.23359e-12	24.2698	0.856047	0.54942	-0.306627	7	24826028	R	II		IGR	opensea	IGR-opensea		0.0467225	0.0550125
cg25684151	0.849508	-12.0746	4.11327e-15	3.23493e-12	24.2675	0.880015	0.559695	-0.32032	8	126588554	F	II		IGR	opensea	IGR-opensea		0.0486457	0.0589999
cg08288126	0.820937	-12.0543	4.34326e-15	3.37602e-12	24.2146	0.850304	0.541949	-0.308355	3	12392792	F	II	PPARG	TSS1500	opensea	TSS1500-opensea		0.0451286	0.0690949
cg17444385	0.131699	12.0334	4.59388e-15	3.53786e-12	24.1601	0.102309	0.410907	0.308598	1	161951161	R	II		IGR	shelf	IGR-shelf	chr1:161953616-161954039	0.048139	0.0472262
cg19580293	0.851462	-12.0318	4.61395e-15	3.54172e-12	24.1559	0.881297	0.568033	-0.313264	10	126790228	F	II	CTBP2	5'UTR	opensea	5'UTR-opensea		0.0493106	0.0435772
cg17439633	0.136796	12.003	4.98436e-15	3.77778e-12	24.0809	0.106561	0.424028	0.317467	11	57176260	F	II	SLC43A3	Body	opensea	Body-opensea		0.0498721	0.046655
cg09981964	0.131191	12.0027	4.98753e-15	3.77778e-12	24.0803	0.100694	0.420915	0.320222	7	148001779	R	II	CNTNAP2	Body	opensea	Body-opensea		0.0454808	0.0813005
cg04673701	0.130778	11.9935	5.11223e-15	3.83954e-12	24.0563	0.101453	0.409367	0.307915	13	52188823	R	II	WDFY2	Body	opensea	Body-opensea		0.0463469	0.0623923
cg13618516	0.862807	-11.9725	5.40917e-15	4.02106e-12	24.0014	0.891988	0.58559	-0.306398	17	79129078	R	II	AATK	Body	shelf	Body-shelf	chr17:79131879-79132084	0.0487298	0.0398064
cg26065310	0.86648	-11.9494	5.75692e-15	4.22853e-12	23.9409	0.895085	0.594729	-0.300356	9	139812238	R	II	TRAF2	Body	opensea	Body-opensea		0.0453325	0.0613067
cg07699323	0.840405	-11.9476	5.78444e-15	4.24375e-12	23.9362	0.870212	0.557237	-0.312974	8	90987606	R	II	NBN	Body	opensea	Body-opensea		0.046936	0.0661801
cg09213710	0.846228	-11.943	5.85656e-15	4.27427e-12	23.9242	0.874927	0.573589	-0.301338	9	107953895	R	II		IGR	opensea	IGR-opensea		0.0481534	0.0378515
cg20990473	0.866086	-11.932	6.03291e-15	4.3632e-12	23.8953	0.897302	0.569528	-0.327774	14	91827651	F	II	CCDC88C	Body	opensea	Body-opensea		0.049637	0.0667087
cg12889391	0.797001	-11.9036	6.51324e-15	4.66008e-12	23.8209	0.827388	0.508332	-0.319056	12	42593535	R	II	YAF2	Body	opensea	Body-opensea		0.0491274	0.0598327
cg21757790	0.827529	-11.8942	6.67983e-15	4.74955e-12	23.7963	0.857509	0.542717	-0.314792	21	37574701	F	II	DOPEY2	Body	opensea	Body-opensea		0.0497905	0.0478251
cg09576161	0.134437	11.8636	7.25675e-15	5.09193e-12	23.7158	0.105203	0.412161	0.306958	1	236086969	R	II		IGR	opensea	IGR-opensea		0.0465571	0.0639737
cg05348871	0.156433	11.8521	7.48448e-15	5.22881e-12	23.6857	0.127182	0.434323	0.307141	11	36397127	F	II	PRR5L	5'UTR	shore	5'UTR-shore	chr11:36397926-36399398	0.0490865	0.0432691
cg10264003	0.129861	11.8508	7.5116e-15	5.24318e-12	23.6822	0.0998888	0.414596	0.314707	11	110198965	F	II		IGR	opensea	IGR-opensea		0.0490391	0.0563044
cg26416566	0.777788	-11.8454	7.62141e-15	5.30135e-12	23.6681	0.806692	0.503199	-0.303493	14	62204928	R	II	HIF1A	Body	opensea	Body-opensea		0.0472584	0.0546114
cg18728264	0.181265	11.8318	7.90789e-15	5.47495e-12	23.6322	0.152143	0.457921	0.305778	11	118766491	F	I	CXCR5	1stExon	opensea	1stExon-opensea		0.0461611	0.0662057
cg20913894	0.163254	11.8316	7.91202e-15	5.47495e-12	23.6317	0.13087	0.470902	0.340032	2	197280311	R	II	HECW2	Body	opensea	Body-opensea		0.0464526	0.100072
cg10537627	0.83528	-11.8009	8.59847e-15	5.83893e-12	23.5508	0.865603	0.547212	-0.318391	4	81022430	R	II		IGR	opensea	IGR-opensea		0.0486258	0.0663341
cg18634760	0.84849	-11.7942	8.75598e-15	5.9016e-12	23.5331	0.877689	0.571103	-0.306586	13	46679242	R	II	CPB2	TSS200	opensea	TSS200-opensea		0.04888	0.0471131
cg13087673	0.881855	-11.7941	8.7571e-15	5.9016e-12	23.533	0.911555	0.599699	-0.311857	12	1212255	R	II	ERC1	Body	opensea	Body-opensea		0.0482064	0.0609433
cg20470583	0.786638	-11.6165	1.42078e-14	8.70984e-12	23.0621	0.816421	0.503698	-0.312723	12	32638830	F	II	FGD4	TSS200	opensea	TSS200-opensea		0.0499222	0.0553798
cg27611767	0.779796	-11.5899	1.5279e-14	9.22522e-12	22.9914	0.808464	0.507452	-0.301012	15	52201998	F	II	TMOD3	3'UTR	opensea	3'UTR-opensea		0.049199	0.0433409
cg13645963	0.860911	-11.5782	1.57782e-14	9.42009e-12	22.9601	0.891742	0.568013	-0.323729	9	84150624	R	II		IGR	opensea	IGR-opensea		0.0499697	0.0717458
cg17569842	0.130261	11.4655	2.15028e-14	1.22443e-11	22.6586	0.101604	0.402496	0.300891	4	3371566	R	II	RGS12	Body	shelf	Body-shelf	chr4:3374733-3374998	0.0495703	0.0453629
cg00647120	0.127713	11.3613	2.86714e-14	1.55415e-11	22.3783	0.0970229	0.419268	0.322245	21	45632571	R	II		IGR	opensea	IGR-opensea		0.0409299	0.117472
cg06583577	0.160054	11.315	3.25887e-14	1.72219e-11	22.2535	0.130935	0.43668	0.305745	5	115897444	F	II	SEMA6A	5'UTR	opensea	5'UTR-opensea		0.0458401	0.0835602
cg02353916	0.784335	-11.1242	5.5459e-14	2.62886e-11	21.7351	0.813484	0.50742	-0.306065	4	15691786	F	II	LOC285550	3'UTR	opensea	3'UTR-opensea		0.0452522	0.092148
cg26848395	0.125238	11.006	7.72718e-14	3.4048e-11	21.4114	0.0948234	0.414181	0.319357	19	4915401	R	II	UHRF1	Body	shore	Body-shore	chr19:4916560-4916784	0.0480337	0.0958754
cg06132170	0.860144	-10.8226	1.29735e-13	5.13436e-11	20.9055	0.902583	0.456976	-0.445607	8	134267886	F	II	NDRG1	Body	opensea	Body-opensea		0.03701	0.223355
cg18218812	0.120109	10.1192	9.86094e-13	2.68624e-10	18.922	0.0879775	0.425353	0.337376	22	24163174	R	II	SMARCB1	Body	opensea	Body-opensea		0.0442864	0.150076
cg14509133	0.108716	8.44465	1.58291e-10	1.77668e-08	13.9387	0.078724	0.393637	0.314913	22	46983780	R	I		IGR	opensea	IGR-opensea		0.0474141	0.173766
